# Supplementary material
Source: publisher figshare collection journal article supplement (https://acs.figshare.com/ndownloader/files/4199458)
Supplement: Supplementary file 1 [file 4199458]

# **A distal pocket Leu residue inhibits the binding of O<sub>2</sub> and NO at the distal site of cytochrome *c'***

Elizabeth M. Garton<sup>†</sup>, David A. Pixton<sup>†</sup>, Christine A. Petersen<sup>†</sup>, Robert R. Eady<sup>‡</sup>, S. Samar Hasnain<sup>‡</sup>, and Colin R. Andrew<sup>†\*</sup>.

<sup>†</sup>Department of Chemistry and Biochemistry, Eastern Oregon University, La Grande, OR 97850, <sup>‡</sup> Molecular Biophysics Group, Faculty of Health and Life Sciences, Institute of Integrative Biology, University of Liverpool, Liverpool, L69 7ZB, UK.

## **SUPPLEMENTARY INFORMATION**

## Materials and Methods

*Preparation of protein samples.* Samples of AXCP were prepared as previously described.<sup>1,2</sup> Ferrous, oxy and nitrosyl complexes of L16A were prepared by first oxidizing the as-isolated form of the protein to the ferric state by reaction with a 2000-fold excess of 1 M ferricyanide solution at room temperature for 10 min. Excess ferricyanide was removed using a P6-DG desalting column. Ferrous L16A was generated inside an anaerobic glove box by reduction of the ferric protein with a ten-fold excess of 2-mM sodium dithionite solution. Excess reductant was removed using either a P6-DG desalting column or a minispin desalting column (Zeba filter, Pierce). Oxy and nitrosyl complexes of L16A AXCP were prepared by reaction of ferrous protein with buffer solution containing dissolved O<sub>2</sub> and NO, respectively.

*RR spectroscopy.* Protein samples for RR measurements were diluted to approximately 100  $\mu$ M (in heme) using pH 7.0 buffer (50 mM MOPS, 0.1 M NaCl). The oxy complex of L16A was generated from ferrous protein by the introduction of either <sup>16</sup>O<sub>2</sub> or <sup>18</sup>O<sub>2</sub> gas into the headspace of a septum-sealed capillary tube using a gas-tight Hamilton syringe. The identity of RR samples was verified by UV-vis spectroscopy before and after exposure to the laser beam using a modified Cary 50 spectrophotometer. Resonance Raman (RR) spectra were recorded on a custom McPherson 2061/207 spectrograph (set to 0.67 m) equipped with a Princeton Instruments liquid N<sub>2</sub>-cooled (LN-1100PB) CCD detector. Excitation wavelengths were provided by a Kr ion laser (413 nm), and a He-Cd laser (442 nm) and Rayleigh scattering was attenuated using Kaiser supernotch filters. RR spectra were collected at room temperature in a 90°-scattering geometry for periods of 5–10 minutes using laser powers of 5 – 10 mW measured at the sample. Frequencies were calibrated relative to aspirin and indene as standards, and are accurate to  $\pm 1$  cm<sup>-1</sup>.

*Kinetic measurements and absorbance spectra.* Kinetic measurements were conducted at 25.0 °C in pH 8.9 buffer containing 50 mM CHES and 0.1 M NaCl (to match previous reaction conditions for native AXCP) using an Applied Photophysics SX.18MV-R stopped-flow spectrophotometer (dead time ~1 ms) housed within an anaerobic glove box (Coy Laboratory Products Inc.). Rate constants for O<sub>2</sub> binding were determined by rapidly mixing a solution of ferrous L16A (~4 μM heme) with an equal volume of buffer containing dissolved O<sub>2</sub>, and monitoring the formation of the oxy complex at 416 nm using a photomultiplier detector. Solutions of O<sub>2</sub> were prepared by equilibrating an O<sub>2</sub>/N<sub>2</sub> gas mixture with buffer at 25.0 °C, assuming the concentration of 1 atm aqueous O<sub>2</sub> to be 1.3 mM. Concentrations of dissolved O<sub>2</sub> (26 – 104 μM after mixing) were maintained in at least 10-fold excess over the heme binding sites to ensure pseudo-first order conditions. Values of pseudo-first order rate constants,  $k_{\text{obs}}$ , were determined from single exponential fits of time courses, and are the average of 3–5 separate kinetic runs. The bimolecular rate constant for O<sub>2</sub> binding ( $k_{\text{on}}$ ) was determined from the slope of plot of  $k_{\text{obs}}$  versus O<sub>2</sub> concentration. Rate constants for NO binding were obtained using a similar approach to that described above for O<sub>2</sub>. In this case, concentrations of dissolved NO (42 – 136 μM after mixing) were prepared by equilibrating an NO/N<sub>2</sub> gas mixture with buffer at 25.0 °C, assuming the concentration of 1 atm aqueous NO to be 1.9 mM.

The O<sub>2</sub> off-rate constant,  $k_{\text{off}}(\text{O}_2)$  for L16A was determined by reacting the oxy complex with a solution of sodium dithionite (5 – 400 mM) as O<sub>2</sub> scavenger.<sup>3</sup> The reaction mixture also contained ~0.5 mM CO which rapidly binds to pentacoordinate ferrous heme of the L16A variant, thereby trapping and stabilizing the heme upon O<sub>2</sub> release. Under these conditions, O<sub>2</sub> release was monitored via the rate of L16A CO complex formation (absorption increase at 418 nm) with the rate-determining step being O<sub>2</sub> release from heme. This was confirmed by the observation that the

rate was insensitive to variations in dithionite concentration (5 - 400 mM) as well as the presence or absence of CO. Using an approach similar to that described above for determining  $k_{\text{off}}(\text{O}_2)$ , the release of NO from L16A was studied by reacting the nitrosyl complex with a solution of 28-56 mM sodium dithionite (as NO scavenger) in the presence of ~0.5 mM CO. Under these conditions, the release of NO is apparent from conversion of the 6c heme-NO complex to that of the 6c heme-CO complex (Figure S9a). The release of NO from L16A AXCP is extremely slow, with only ~20% of the expected absorbance change occurring after 19 days (Figure S9a). An exponential fit of the 417-nm absorbance time course (with the final absorbance constrained to the predicted value for the pure 6c-CO end product) yields  $k_{\text{off}} \sim 0.013 \text{ day}^{-1}$  ( $\sim 2 \times 10^{-7} \text{ s}^{-1}$ ). Kinetics measurements over longer time periods were prevented due to reagent and protein instability.

The reaction of native AXCP with  $\text{O}_2$  at pH 8.9 was analyzed by the stopped flow technique. Ferrous native AXCP (prepared in a similar manner to that described above for the L16A variant) was mixed with solutions containing air-saturated buffer in a 1:1 ratio. Time-resolved absorbance spectra (300 – 700 nm) were recorded using a photodiode array detector over a period of 15 min. Global analysis of kinetic data was performed using the Pro Kineticist software package. Ferrous protein converted to the ferric form in a monophasic reaction without any detectable oxy complex (Figure S6) with an observed rate constant,  $k_{\text{ox}} = 4 (\pm 1) \times 10^{-3} \text{ s}^{-1}$ .

**Figure S1.** Absorbance spectra of  $\text{Fe}^{2+}$  and oxy L16A AXCP ( $\sim 2 \mu\text{M}$ ), together with the 416-nm time trace for oxy formation ( $26 \mu\text{M O}_2$ ).

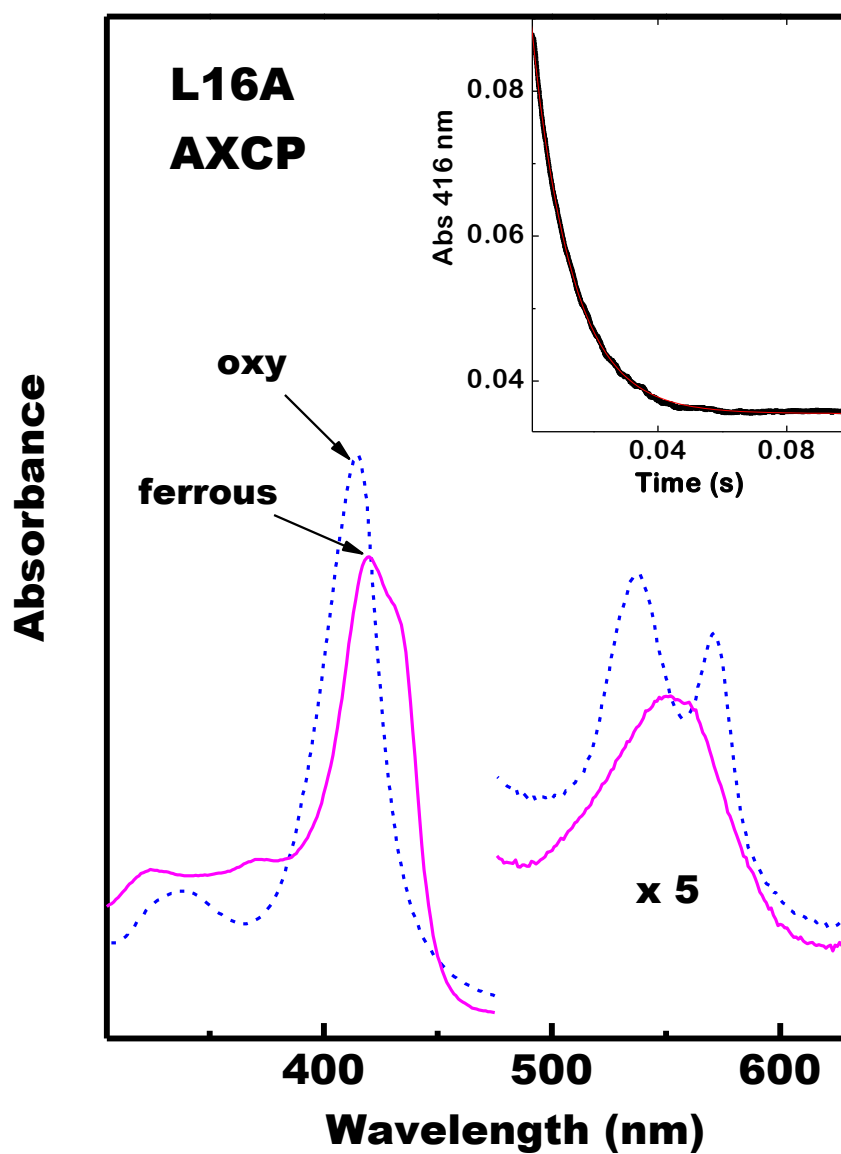

**Figure S2.** High-frequency RR spectrum of 6c-O<sub>2</sub> L16A AXCP complex at room temperature.

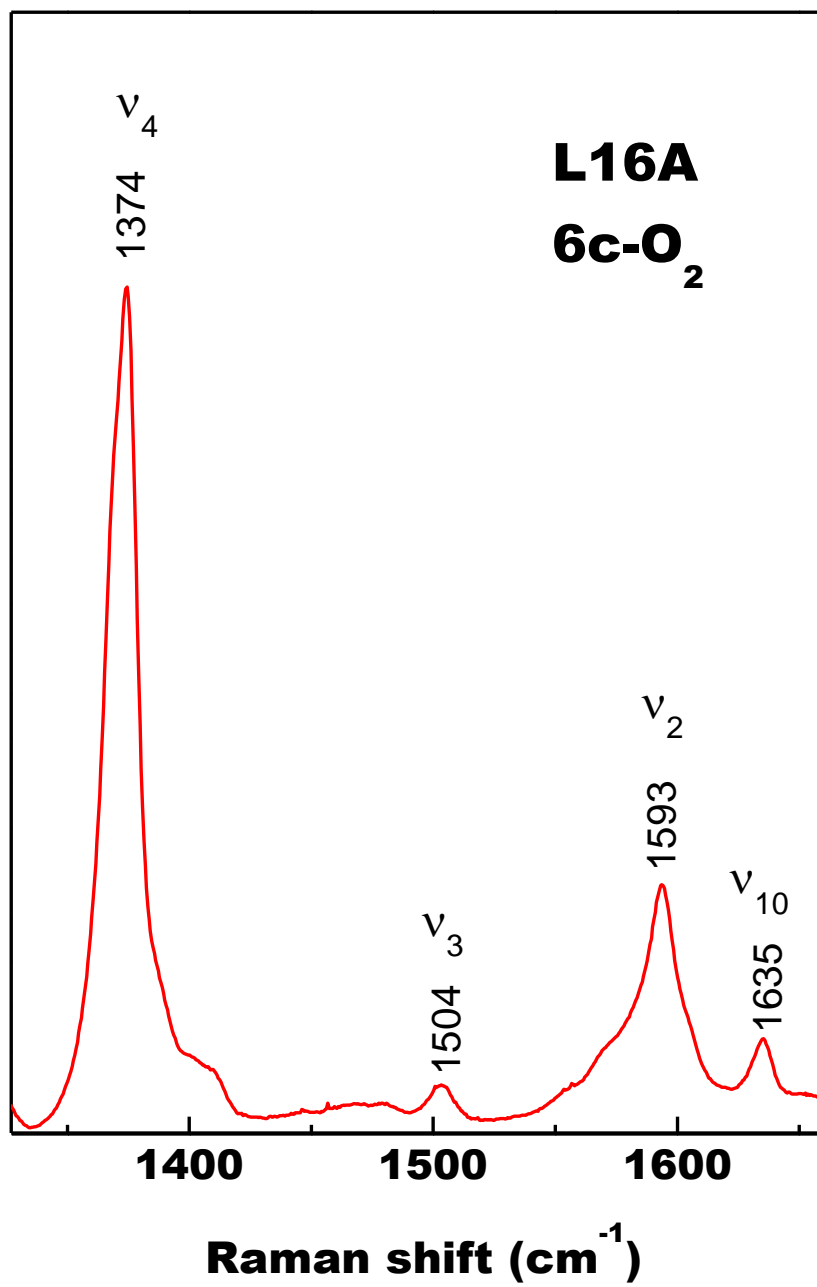

**Figure S3.** Pseudo-first-order rate constants,  $k_{\text{obs}}$ , for the reaction of  $\text{O}_2$  with  $\text{Fe}^{2+}$  L16A AXCP as a function of  $\text{O}_2$  concentration at 25.0 °C.

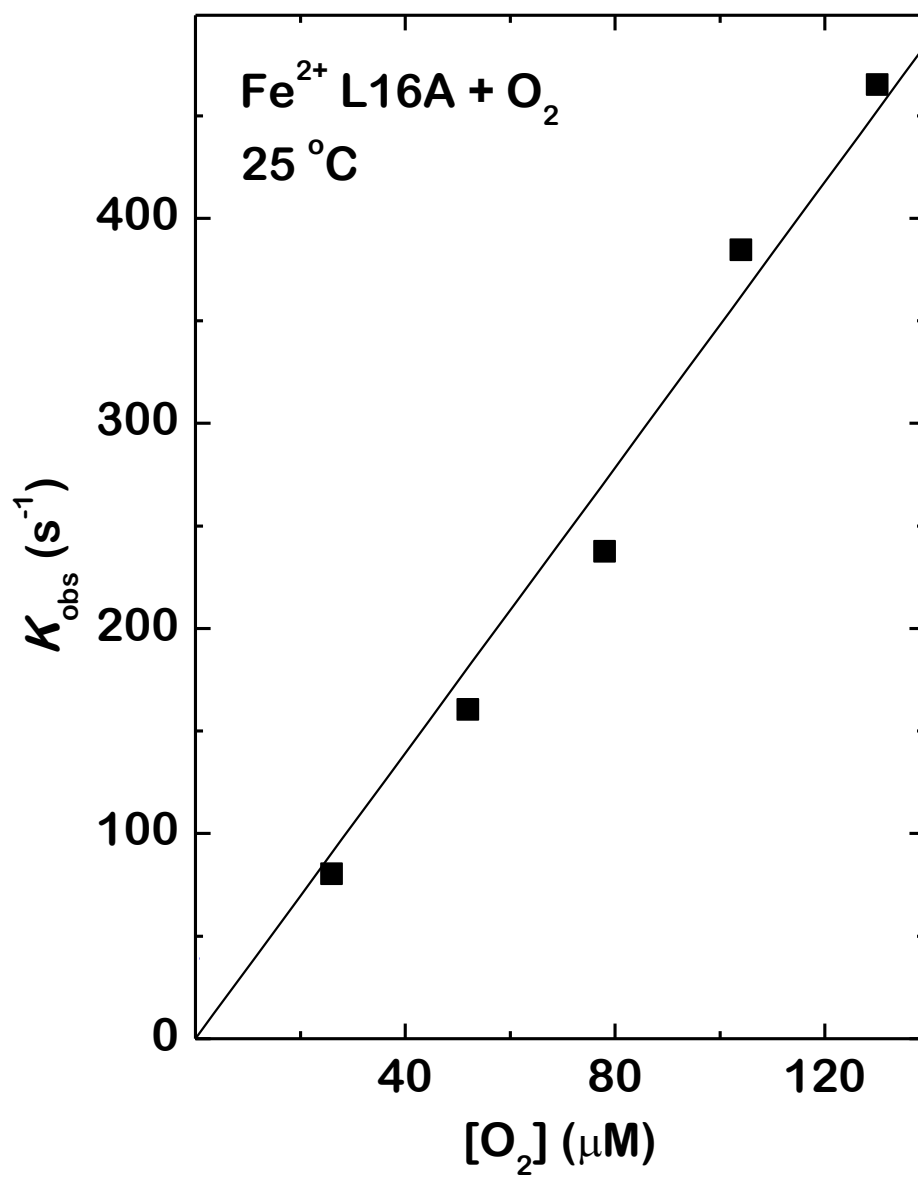

**Figure S4.** Time trace at 418 nm for the release of O<sub>2</sub> from oxy L16A AXCP in the presence of 5 mM dithionite and 0.5 mM CO at 25.0 °C. Overlaid and mostly obscured is a single-exponential fit.

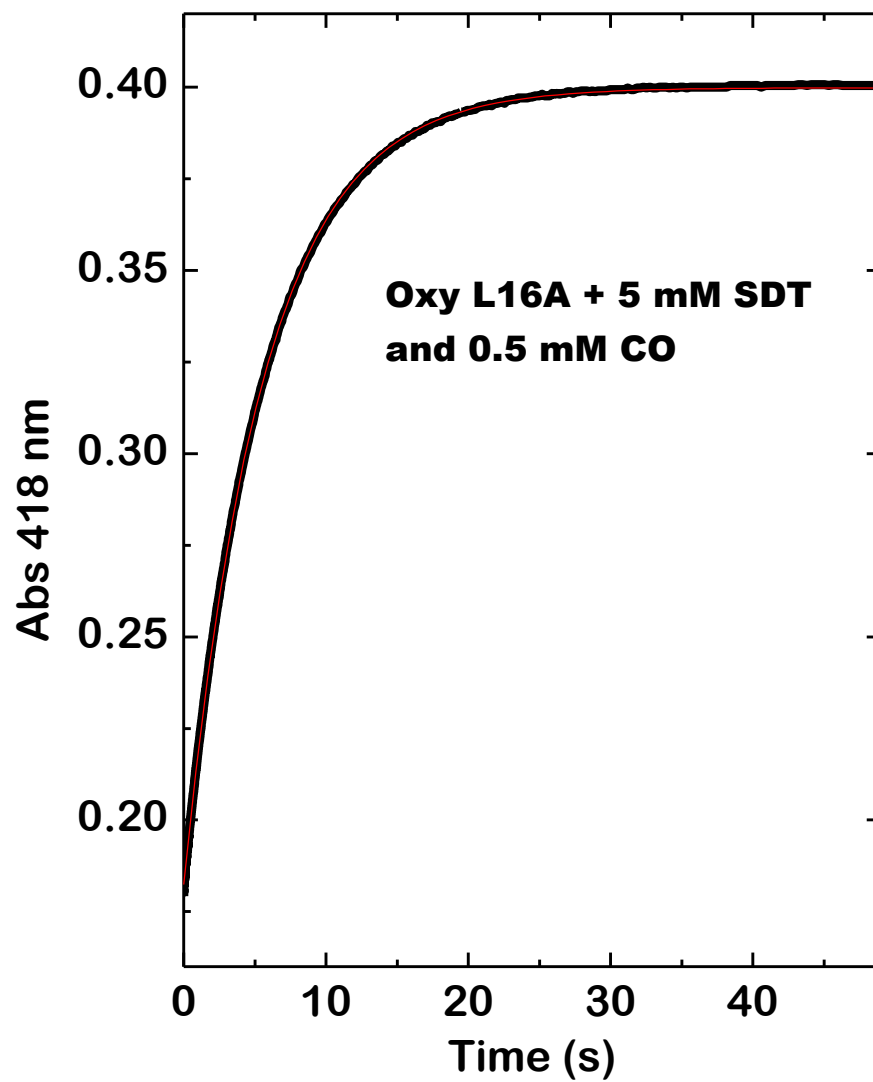



**Figure S5.** Time-dependent changes in the absorbance spectrum of oxy L16A AXCP at pH 8.9. The spectrum of ferric L16A AXCP at pH 8.9 is shown for comparison.

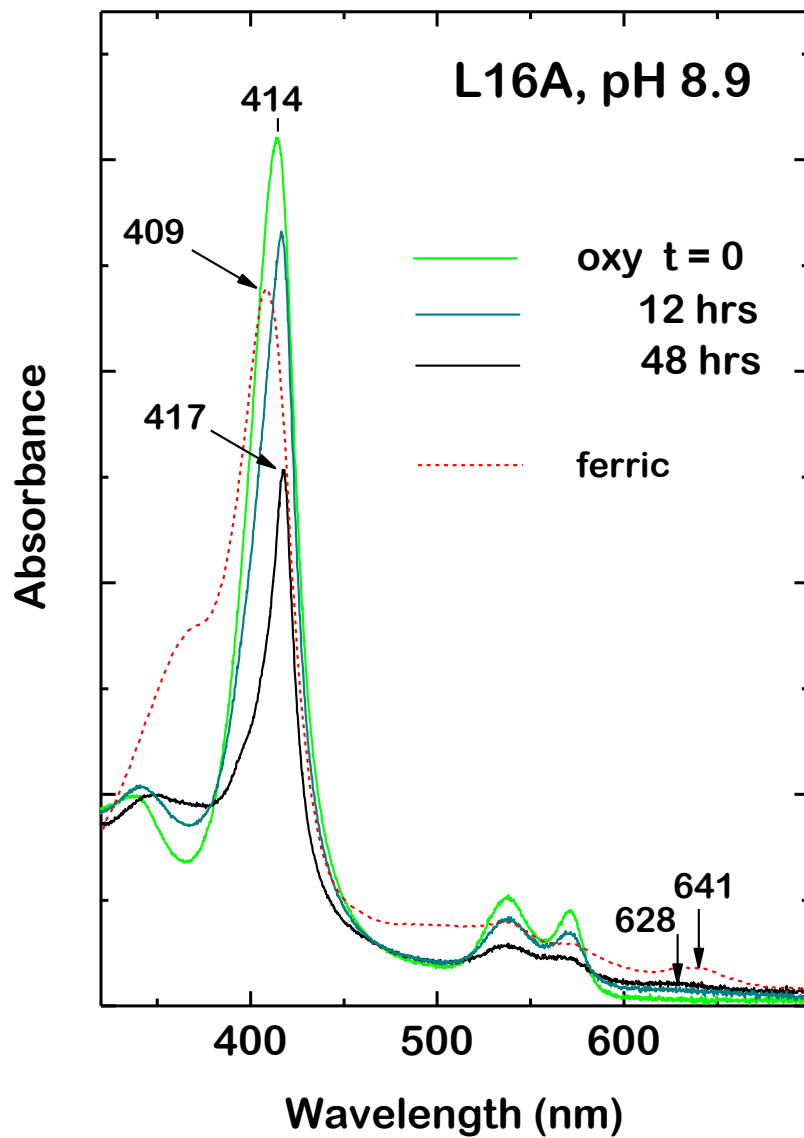

**Figure S6.** Time-dependent absorbance changes showing the autoxidation of 5c-Fe<sup>2+</sup> native AXCP ( $\lambda_{\text{max}}$  424 nm) to the 5c-Fe<sup>3+</sup> state ( $\lambda_{\text{max}}$  406, 640 nm) upon reaction with an air-saturated buffer at pH 8.9, 25 °C. Direct ferrous  $\rightarrow$  ferric conversion (without a detectable oxy complex) is confirmed by the presence of isosbestic points at 325, 414, 455, 528, and 588 nm. The inset shows a reaction time trace at 429 nm (black), overlaid with a 1 exp fit (red).

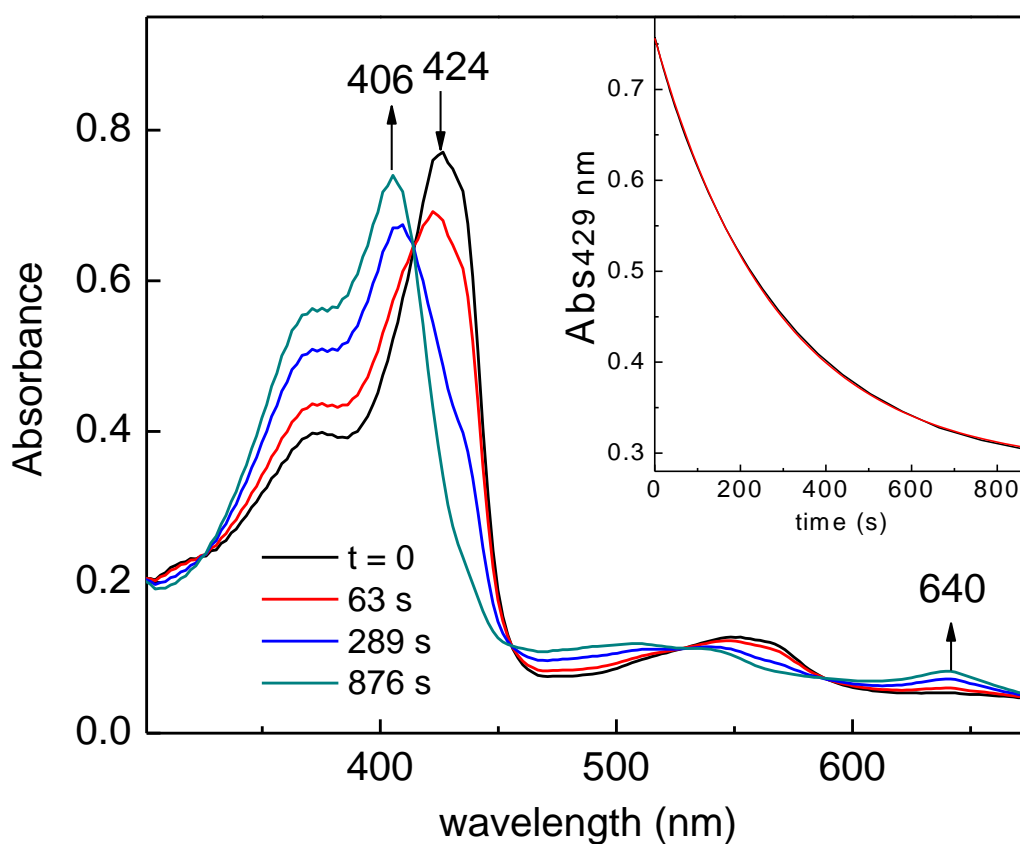

**Figure S7.** Room-temperature RR spectra of  $\text{Fe}^{2+}$  L16A AXCP in the high frequency region (413 nm excitation) with the low frequency region (442 nm excitation) shown as an inset. Asterisks denote possible contributions from a trace amount of heme-CO complex. The  $\nu(\text{Fe-His})$  stretching frequency of L16A AXCP ( $230\text{ cm}^{-1}$ ) is similar to that previously reported for native AXCP ( $231\text{ cm}^{-1}$ )

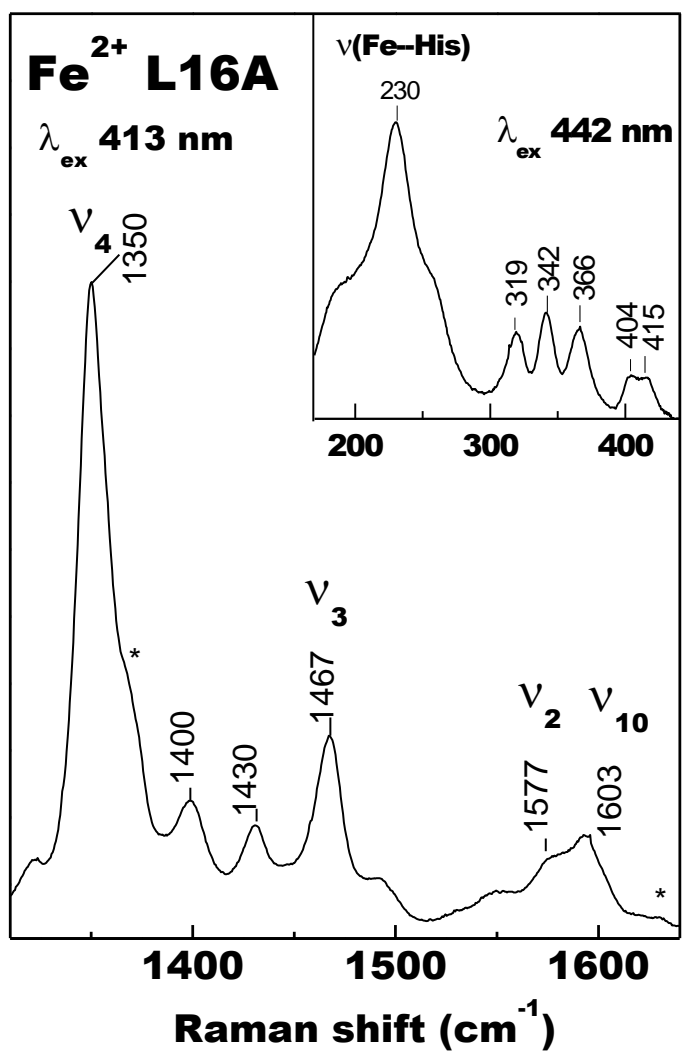

**Figure S8** (a) Absorption spectra of ferrous L16A AXCP (solid line) and its NO complex (dotted line). The inset shows a 416-nm time trace for the NO binding reaction in the presence of 42  $\mu\text{M}$  NO, overlaid with a single exponential fit. (b) Plot of  $k_{\text{obs}}$  vs  $[\text{NO}]$  for NO binding to ferrous L16A AXCP yielding  $k_{\text{on}}(\text{NO}) = 2.9 \times 10^6 \text{ M}^{-1} \text{ s}^{-1}$ .

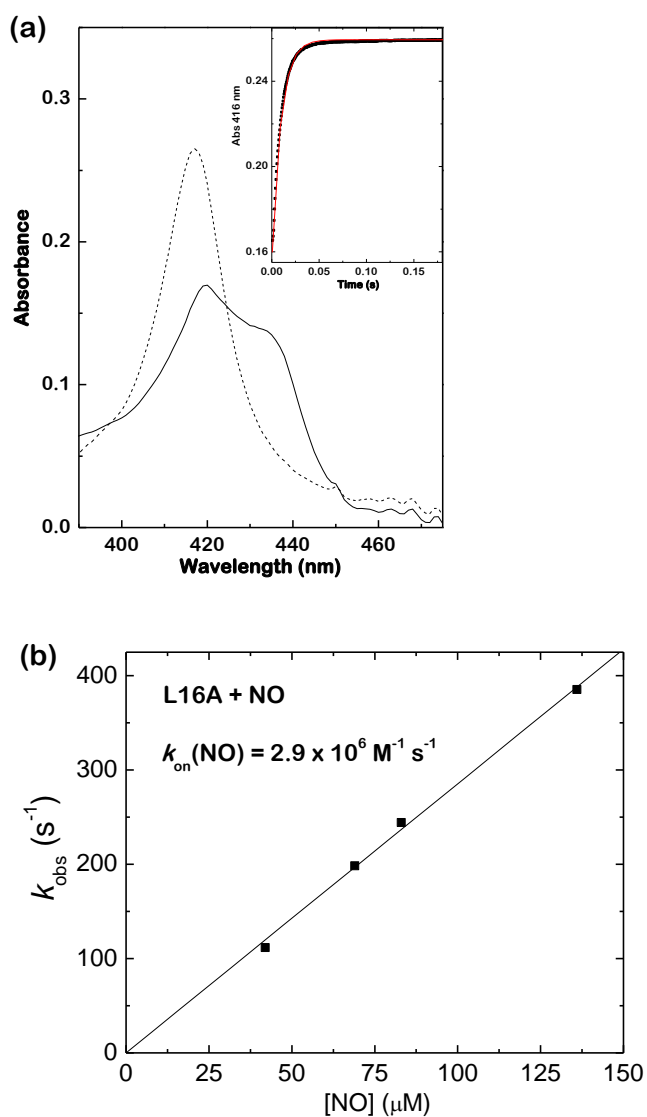

**Figure S9 (a)** Absorption data showing NO release from L16A AXCP in the presence of 25 mM dithionite and 0.5 mM CO. Heme-NO release is apparent from the conversion of the 6c-NO complex (magenta trace) to the 6c-CO complex (absorption of the pure 6c-CO species shown as a dotted trace). The blue trace shows the reaction after 19 days (estimated ~20% complete). **(b)** 417-nm time trace overlaid with a single exponential fit (red line), with the final absorbance constrained to that predicted for the pure 6c-CO end product. The kinetic fit, yielding  $k_{\text{off}(\text{NO})} = 0.013 \text{ day}^{-1}$  ( $\sim 2 \times 10^{-7} \text{ s}^{-1}$ ), has been extended beyond the experimental data to illustrate the predicted reaction time course.

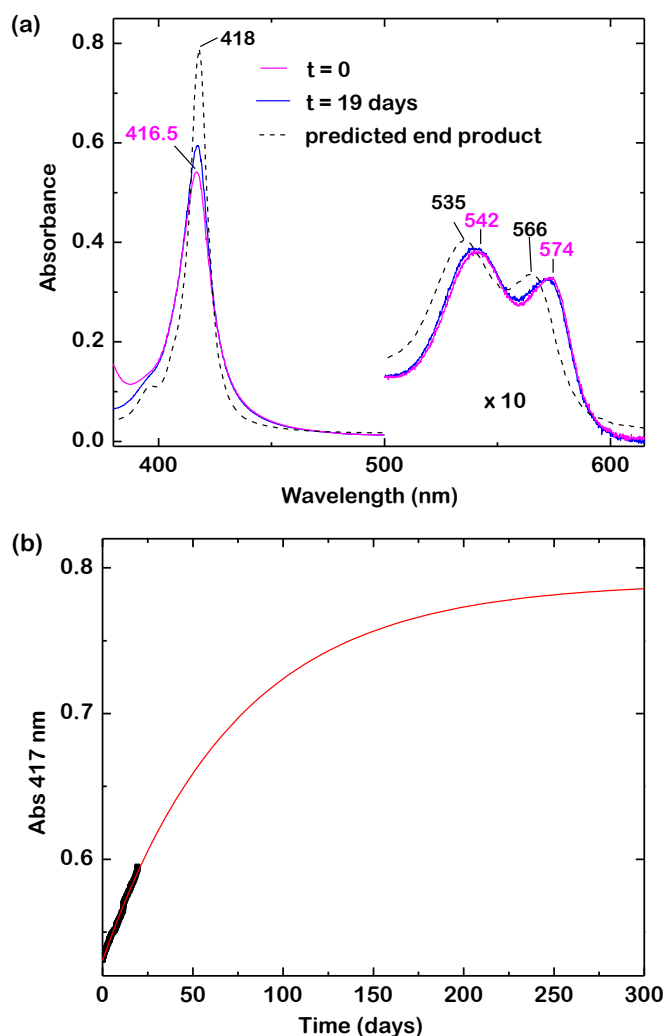

## REFERENCES

- (1) Antonyuk, S.; Rustage, N.; Petersen, C. A.; Arnst, J. L.; Heyes, D. J.; Sharma, R.; Berry, N.; Scrutton, N. S.; Eady, R. R.; Andrew, C. R.; Hasnain, S. S. *Proc. Natl. Acad. Sci. USA* **2011**, *108*, 15780-15785.
- (2) Harris, R. L.; Barbieri, S.; Paraskevopoulos, K.; Murphy, L. M.; Eady, R. R.; Hasnain, S. S.; Sawers, R. G. J. *Mol. Microbiol. Biotechnol.* **2010**, *18*, 102-108.
- (3) Olson, J.; Foley, E.; Maillet, D.; Paster, E. *Methods in Molecular Medicine* **2003**, *82*, 65-91.
- (4) Andrew, C. R.; Green, E. L.; Lawson, D. M.; Eady, R. R. *Biochemistry* **2001**, *40*, 4115-4122.
